# Supplementary material for: HPLC-DAD and UHPLC/QTOF-MS Analysis of Polyphenols in Extracts of the African Species Combretum padoides, C. zeyheri and C. psidioides Related to Their Antimycobacterial Activity
Source: MDPI journal article supplement (doi:10.3390/antibiotics9080459), 2020-07-29
Supplement: s1 [file s1]

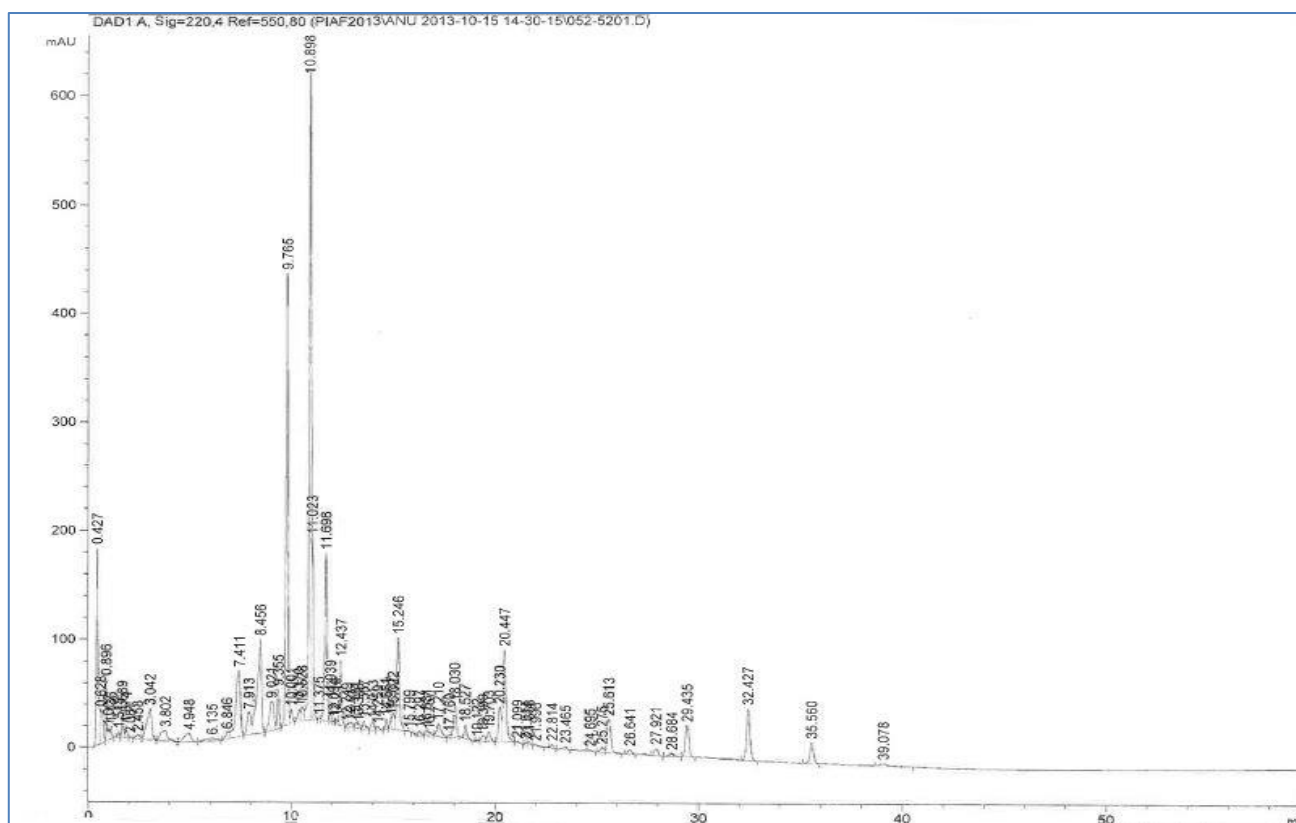

Figure 2S (A). HPLC-DAD chromatograms a methanol extract of the stem bark of *Combretum padoides*. Rt 7.4, ellagitannin; Rt 8.45, ellagitannin; Rt 9.765, ellagitannin; Rt 10.898,  $\alpha$ -Punicalagin anomer or Punicacortein D; Rt 11.69, ellagitannin; Rt 12.437, ellagitannin; Rt 15.246, ellagitannin; Rt 20.23, ellagitannin; Rt 20.447, Ellagic acid arabinoside; Rt 21.4, 3'-O-methyl-4-O-( $\beta$ -D-xylopyranosyl) ellagic acid; Rt 29.435, ellagitannin; Rt 32.427, ellagitannin; Rt 35.560, ellagitannin.

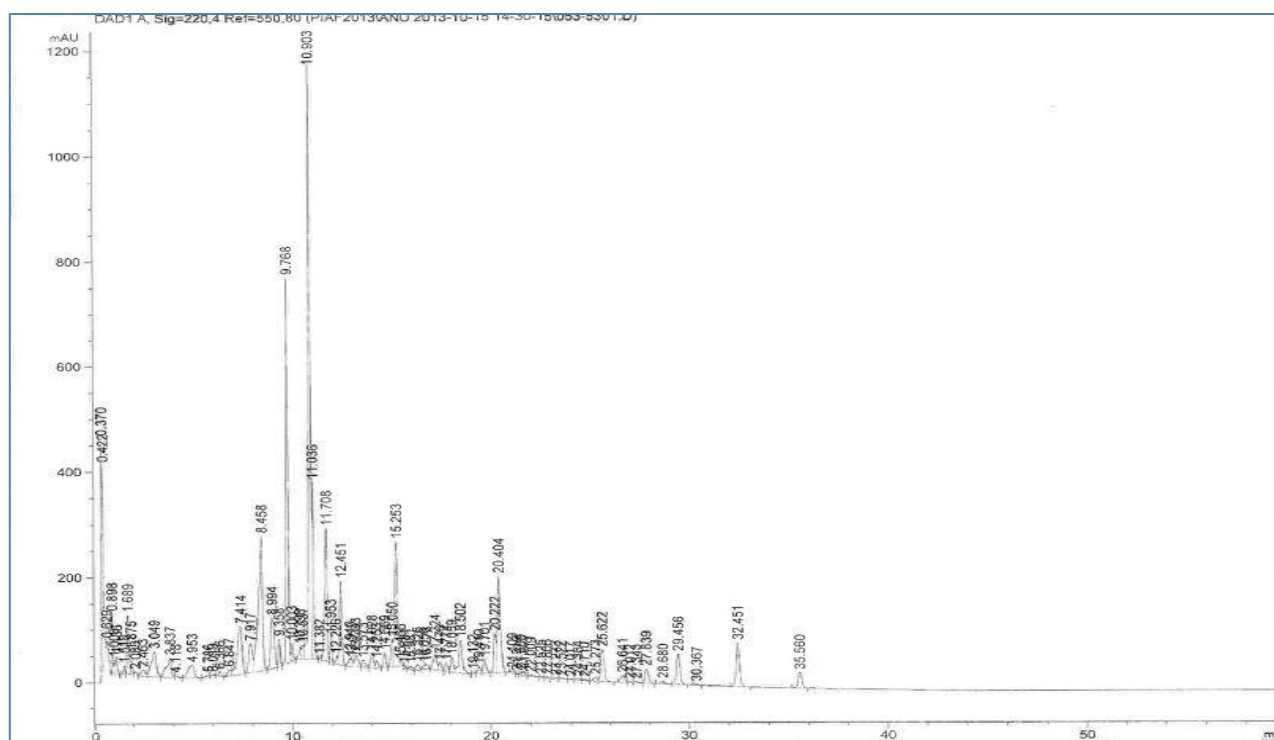

Figure 2S (B). HPLC-DAD chromatograms a butanol extract of the stem bark of *Combretum padoides*. Rt 7.4, ellagitannin; Rt 8.45, ellagitannin; Rt 9.768, ellagitannin; Rt 10.903,  $\alpha$ -Punicalagin anomer or Punicacortein D; Rt 11.7, ellagitannin; Rt 12.451, ellagitannin; Rt 15.263, ellagitannin; Rt 20.22, ellagitannin; Rt 20.40, Ellagic acid arabinoside; Rt 21.4, 3'-O-methyl-4-O-( $\beta$ -D-xylopyranosyl) ellagic acid; Rt 29.4, ellagitannin; Rt 32.4, ellagitannin; Rt 35.5, ellagitannin.
